# Supplementary material for: [NH4]12[(MoO2)2O(HPO4)2]4[PO4]X, X = Cl, Br—new porous layer molybdenophosphates with embedded multiple anionic and cationic guests
Source: Royal Society of Chemistry journal article supplement (doi:10.1039/b817406g), 2008-12-08
Supplement: b817406g.pdf [file b817406g.pdf]

## Electronic Supplementary Information

- (i) SEM micrographs
- (ii) EDX Analysis data Table 1

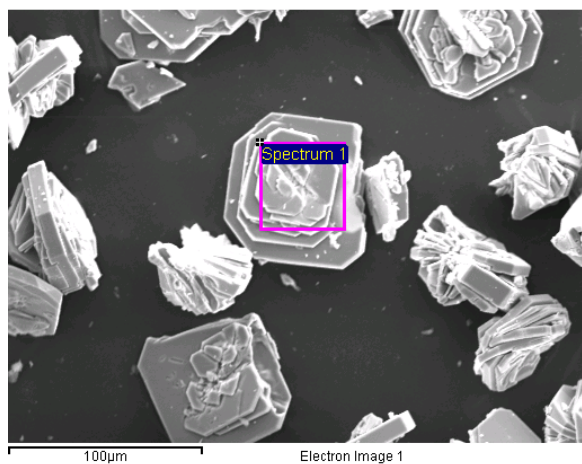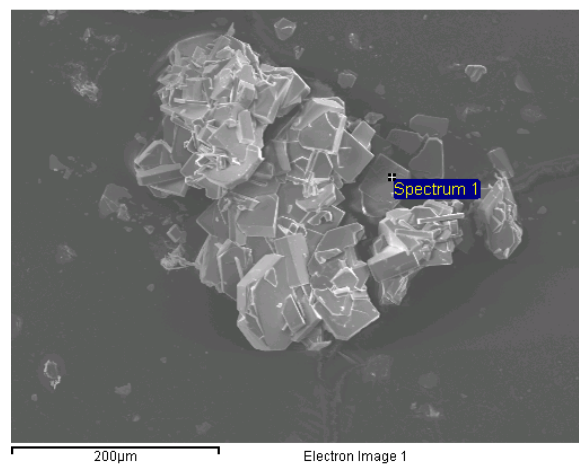

SEM micrographs for  $[\text{NH}_4]_{12}[(\text{MoO}_2)_2\text{O}(\text{HPO}_4)_2]_4[\text{PO}_4]\text{X}$ . The images above show the Cl (Left) and the Br (Right).

Table 1. EDX data for  $[\text{NH}_4]_{12}[(\text{MoO}_2)_2\text{O}(\text{HPO}_4)_2]_4[\text{PO}_4]\text{Cl}$

|                | <b>Mo%</b>   | <b>P%</b>    | <b>Cl%</b>  | <b>Mo/P</b>  | <b>Mo/Cl</b> |
|----------------|--------------|--------------|-------------|--------------|--------------|
|                | 18.85        | 18.77        | 2.46        | 1.004        | 7.663        |
|                | 20.70        | 20.89        | 2.75        | 0.991        | 7.527        |
|                | 22.45        | 23.44        | 2.79        | 0.957        | 8.047        |
|                | 21.26        | 21.78        | 2.54        | 0.976        | 8.370        |
|                | 21.18        | 22.63        | 2.83        | 0.936        | 7.484        |
|                | 20.71        | 20.90        | 2.49        | 0.991        | 8.317        |
|                | 20.82        | 21.99        | 2.92        | 0.947        | 7.130        |
| <b>Average</b> | <b>20.85</b> | <b>21.49</b> | <b>2.68</b> | <b>0.972</b> | <b>7.791</b> |

Calculated values based upon chemical formula: Mo/P/Cl = 1/0.889/8

Table 2. EDX data for  $[\text{NH}_4]_{12}[(\text{MoO}_2)_2\text{O}(\text{HPO}_4)_2]_4[\text{PO}_4]\text{Br}$

|                | <b>Mo%</b>   | <b>P%</b>    | <b>Br%</b>  | <b>Mo/P</b>  | <b>Mo/Br</b> |
|----------------|--------------|--------------|-------------|--------------|--------------|
|                | 24.27        | 23.38        | 2.73        | 1.038        | 8.890        |
|                | 24.62        | 24.05        | 2.69        | 1.024        | 9.152        |
|                | 22.26        | 22.91        | 2.57        | 0.972        | 8.661        |
|                | 22.67        | 22.67        | 2.74        | 1.000        | 8.274        |
|                | 21.75        | 23.30        | 2.96        | 0.933        | 7.348        |
|                | 22.04        | 22.28        | 3.09        | 0.989        | 7.133        |
| <b>Average</b> | <b>22.94</b> | <b>23.10</b> | <b>2.80</b> | <b>0.993</b> | <b>8.243</b> |

Calculated values based upon chemical formula: Mo/P/Br = 1/0.889/8
